# Supplementary material
Source: MDPI journal article supplement (https://www.mdpi.com/2504-477X/6/9/272)
Supplement: s1 [file s1]

## SUPPORTING INFORMATION

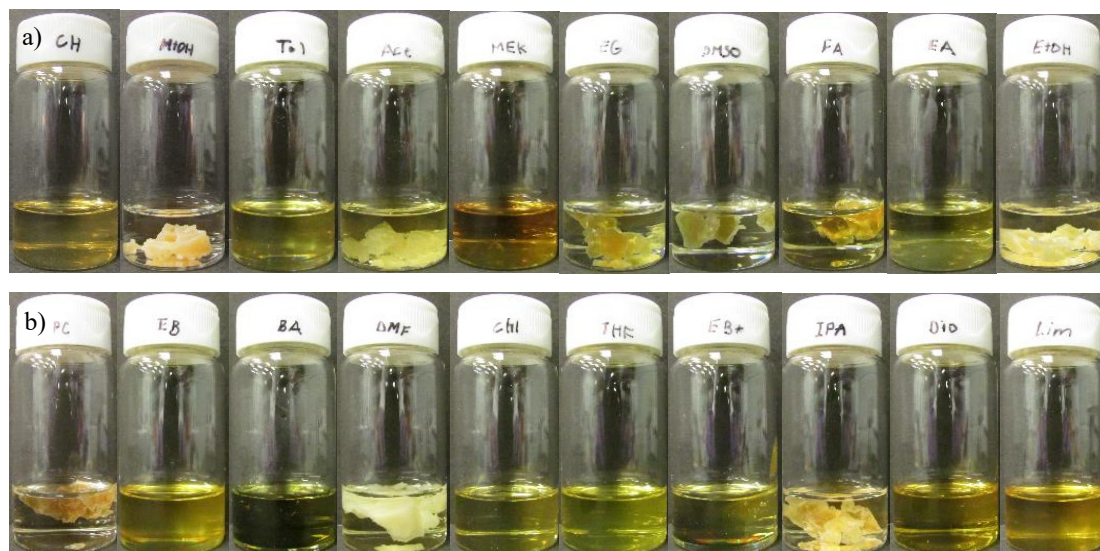

Figure S1. Dissolution of SBR in organic solvents after having passed 24 h. Solvents from left to right a) cyclohexane, methanol, toluene, acetone, methyl ethyl ketone, ethylene glycol, dimethyl sulfoxide, formamide, ethyl acetate, ethanol, and b) propylene carbonate, ethyl benzene, benzyl alcohol, dimethyl formamide, chloroform, tetrahydrofuran, ethyl benzoate, 2-propanol, 1,4-dioxane and d-limonene.
